# Supplementary material
Source: publisher figshare collection journal article supplement (https://acs.figshare.com/ndownloader/files/7426624)
Supplement: Supplementary file 1 [file 7426624]

## Supporting Information

### **Real-Time Monitoring ATP in Mitochondrion of Living Cells: a Specific Fluorescent Probe for ATP by Dual Recognition Sites**

Kai-Yue Tan,<sup>†</sup> Chun-Yan Li,<sup>\*,†,§</sup> Yong-Fei Li,<sup>‡</sup> Junjie Fei<sup>†</sup>, Bin Yang,<sup>†</sup> Ya-Jun Fu,<sup>†</sup>  
and Fang Li<sup>†</sup>

<sup>†</sup>Key Laboratory of Environmentally Friendly Chemistry and Applications of Ministry of Education, College of Chemistry, Xiangtan University, Xiangtan, 411105, PR China.

<sup>‡</sup>College of Chemical Engineering, Xiangtan University, Xiangtan, 411105, PR China.

<sup>§</sup>State Key Laboratory of Chemo/Biosensing and Chemometrics, College of Chemistry & Chemical Engineering, Hunan University, Changsha, 410082, PR China.

\*E-mail: lichunyan79@sina.com. Fax: +86-731-58292477.

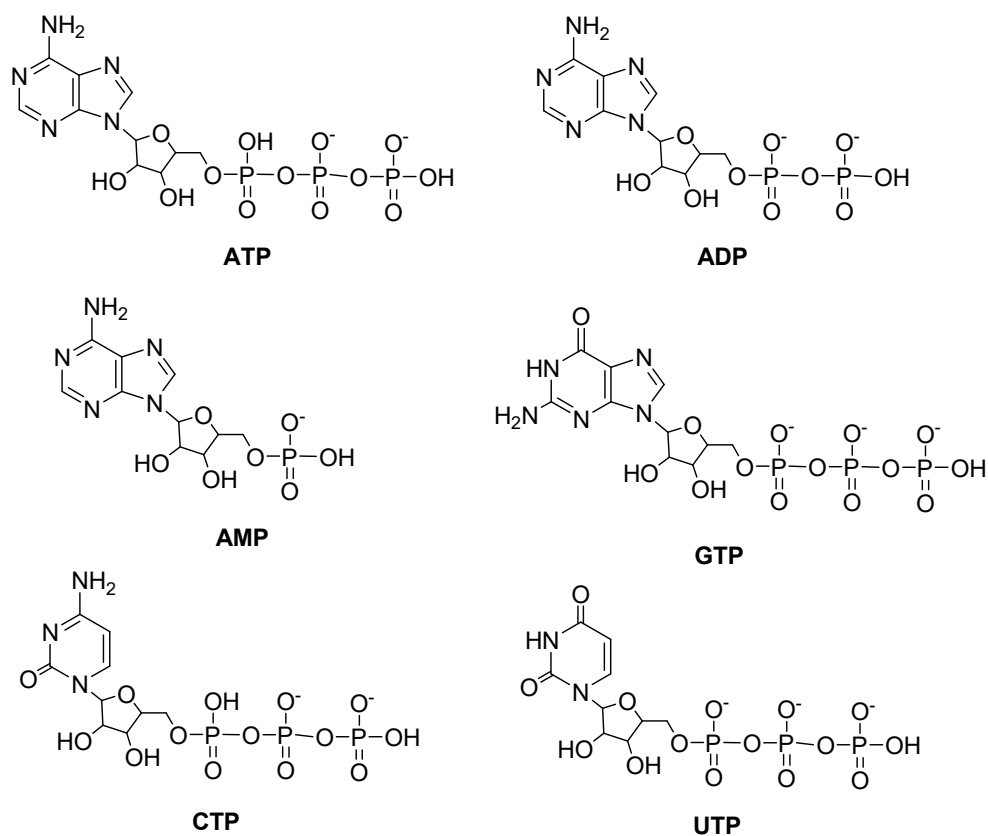

**Figure S1.** The chemical structures of organic phosphate anions.

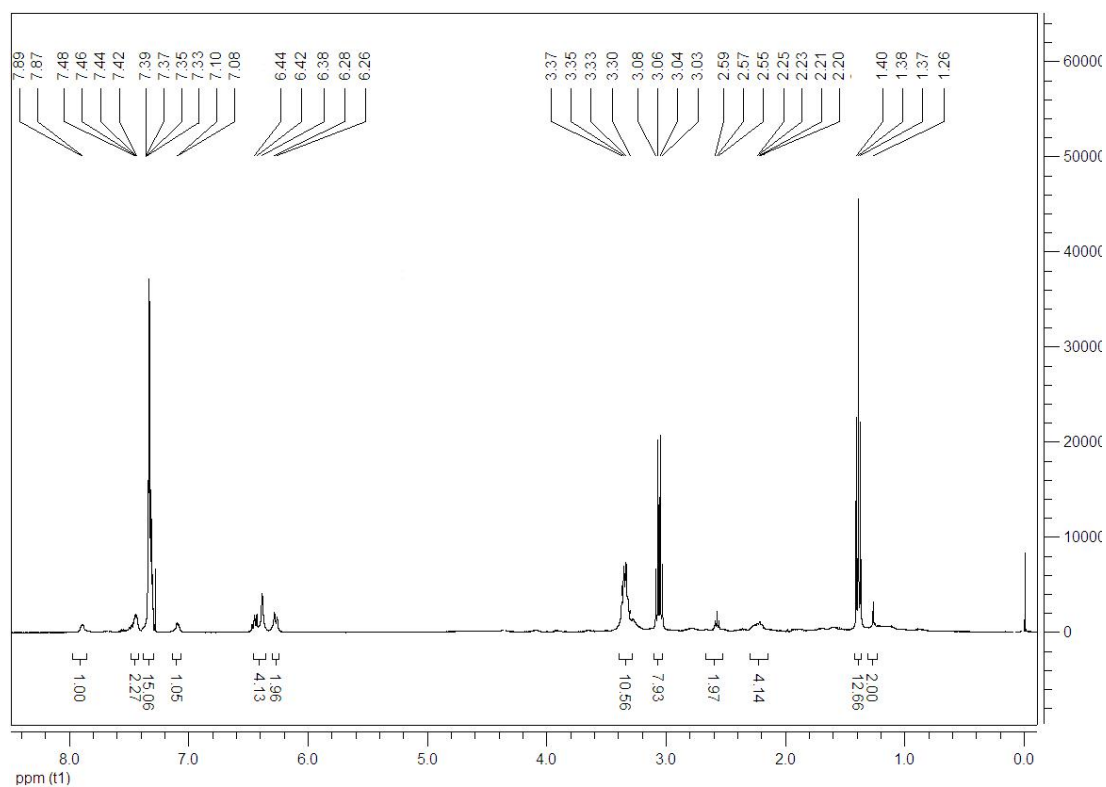

**Figure S2.**  $^1\text{H}$  NMR spectra of Mito-Rh in  $\text{CDCl}_3$ .

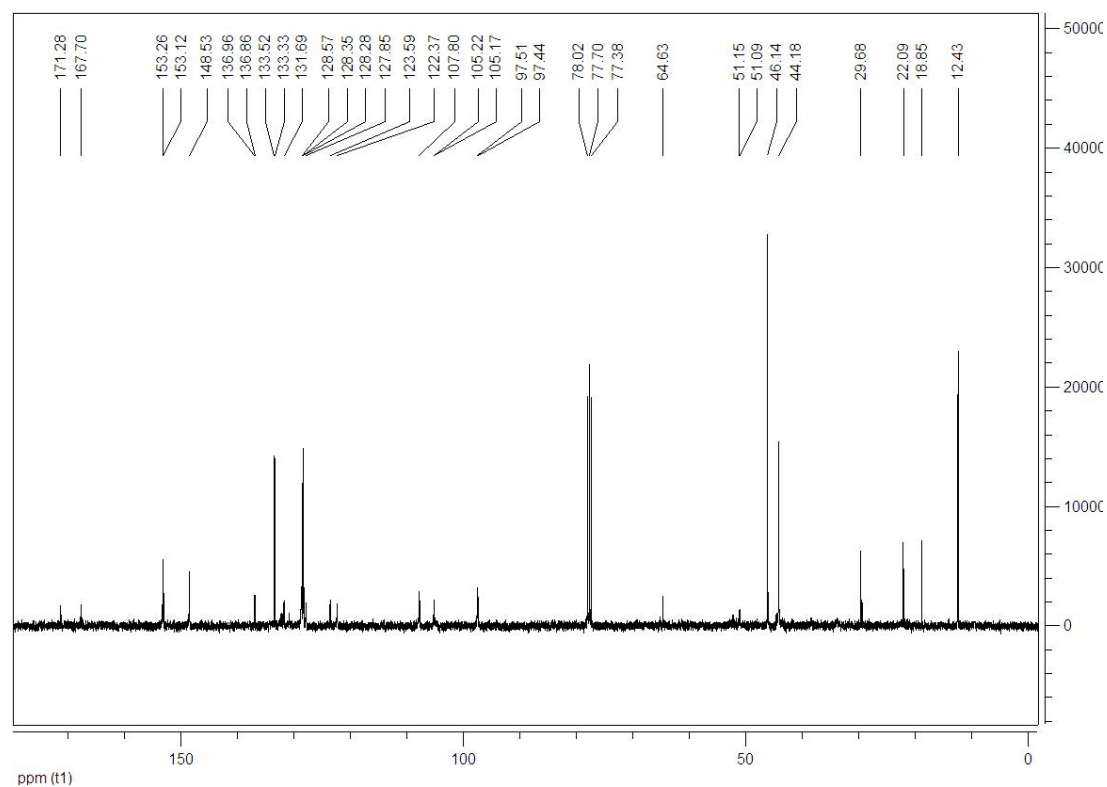

**Figure S3.** <sup>13</sup>C NMR spectra of Mito-Rh in CDCl<sub>3</sub>.

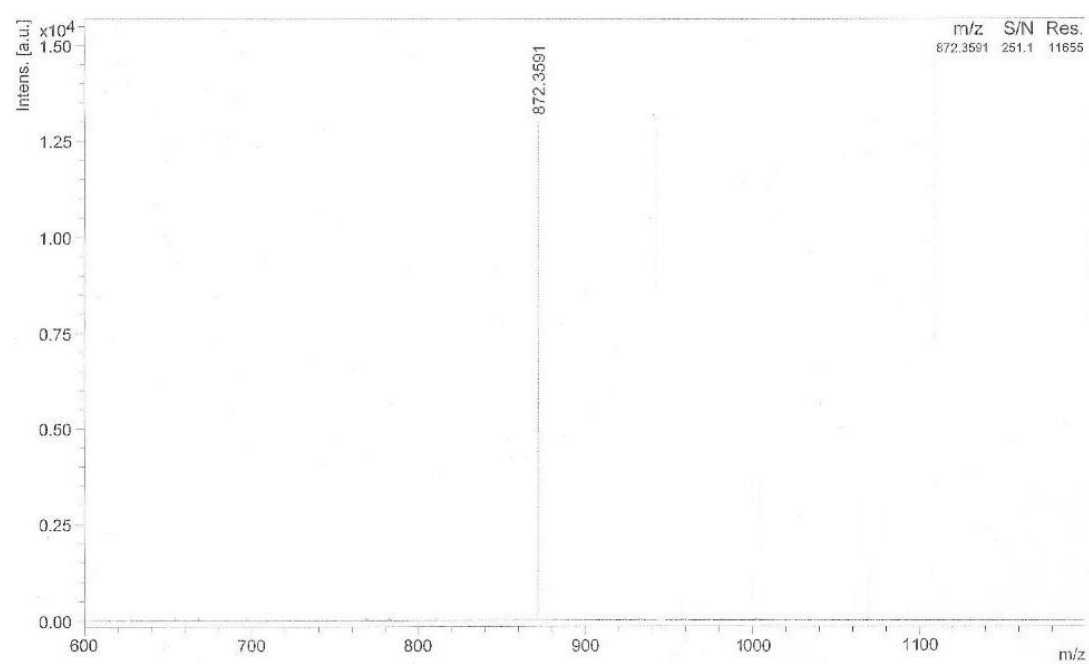

**Figure S4.** Mass spectra of Mito-Rh.

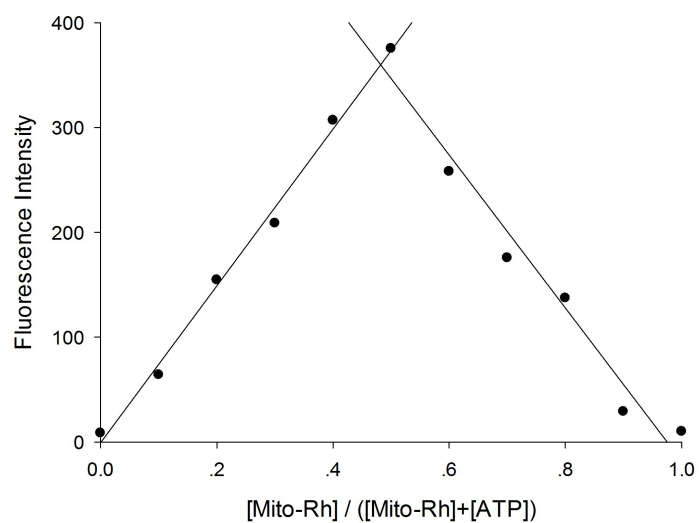

**Figure S5.** The Job plot of Mito-Rh and ATP using fluorescence intensity at 583 nm in PBS buffer solution of pH 7.4 with an excitation at 520 nm. The total concentration of [Mito-Rh] and [ATP] is 10 mM.

The binding constant (K) between the probe and ATP is determined by the Benesie-Hildebrand equation (1).

$$\frac{1}{F - F_0} = \frac{1}{K(F_{\max} - F_0) \times [ATP]} + \frac{1}{F_{\max} - F_0} \quad (1)$$

Where F is the fluorescence intensity at 583 nm at any given ATP concentration,  $F_0$  is the fluorescence intensity at 583 nm in the absence of ATP, and  $F_{\max}$  is the maximal fluorescence intensity at 583 nm in the presence of ATP. Benesie-Hildebrand plot is shown in Figure S6. The K value between the probe and ATP is obtained from the slope of the straight line and is determined to be  $215.6 \text{ M}^{-1}$ .

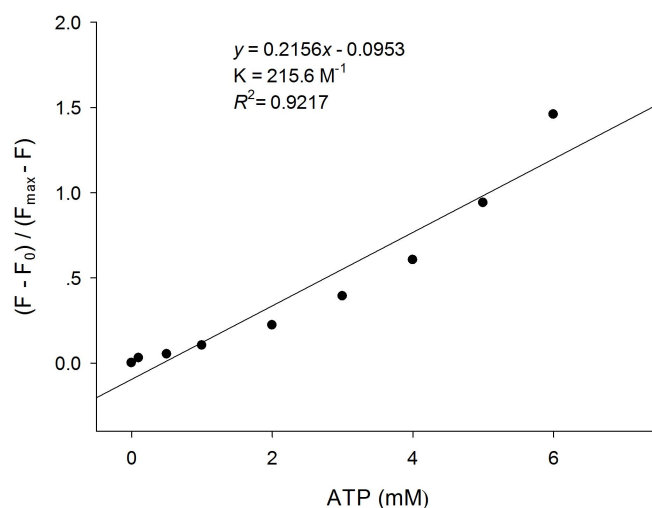

**Figure S6.** Benesie-Hildebrand plot of Mito-Rh-ATP complex in PBS buffered solution of pH 7.4.

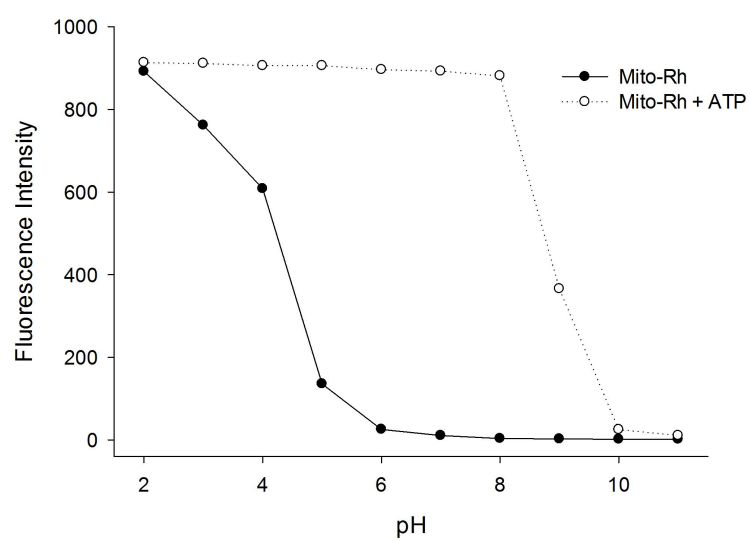

**Figure S7.** Effect of pH on the fluorescence intensity of Mito-Rh (10  $\mu$ M) in the absence of ATP (solid line) and in the presence of ATP (10 mM, dotted line).

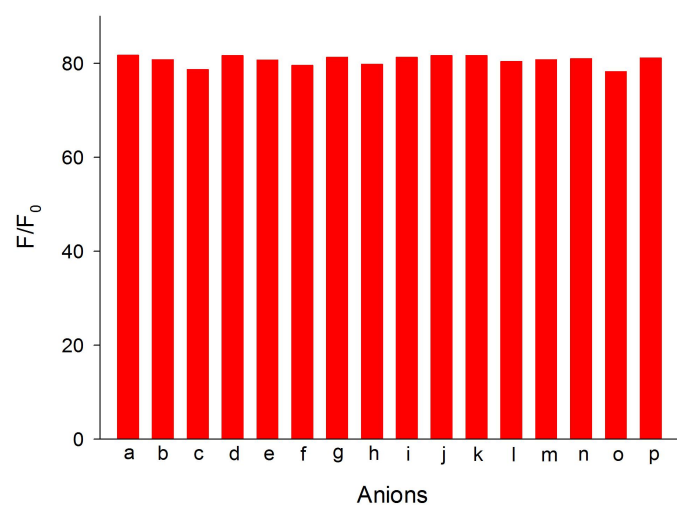

**Figure S8.** Fluorescence response of Mito-Rh (10  $\mu$ M) for 10 mM of other anions at the present of ATP (10 mM) in the PBS buffer solution. Anions (from a to p): ATP, ADP, AMP, GTP, CTP, UTP,  $P_3O_{10}^{5-}$ ,  $P_2O_7^{4-}$ ,  $H_2PO_4^-$ ,  $HPO_4^{2-}$ ,  $PO_4^{3-}$ ,  $Cl^-$ ,  $SO_4^{2-}$ ,  $NO_3^-$ ,  $CH_3CO_2^-$  and  $CO_3^{2-}$ .

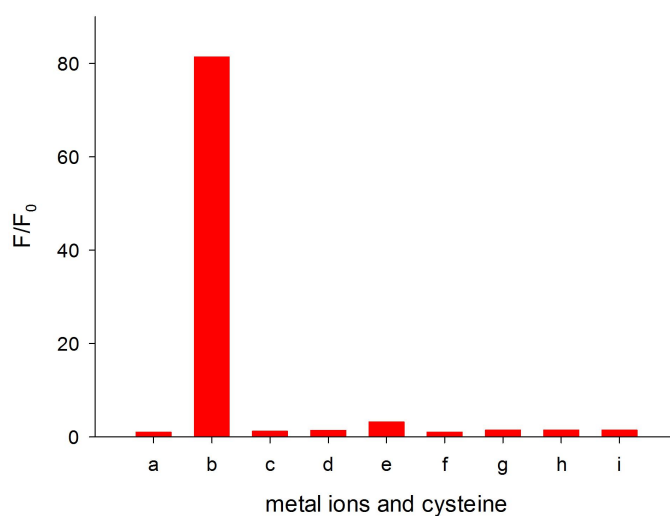

**Figure S9.** Fluorescence response of Mito-Rh (10  $\mu$ M) for 10 mM of ATP or 10 mM of metal ions and cysteine in the PBS buffer solution. Metal ions and cysteine (from a to i): blank, ATP, cysteine,  $Ca^{2+}$ ,  $Mg^{2+}$ ,  $Fe^{2+}$ ,  $Zn^{2+}$ ,  $Na^+$  and  $K^+$ .

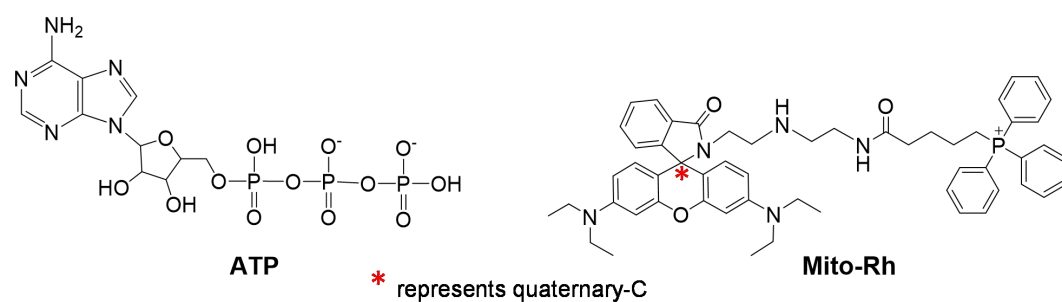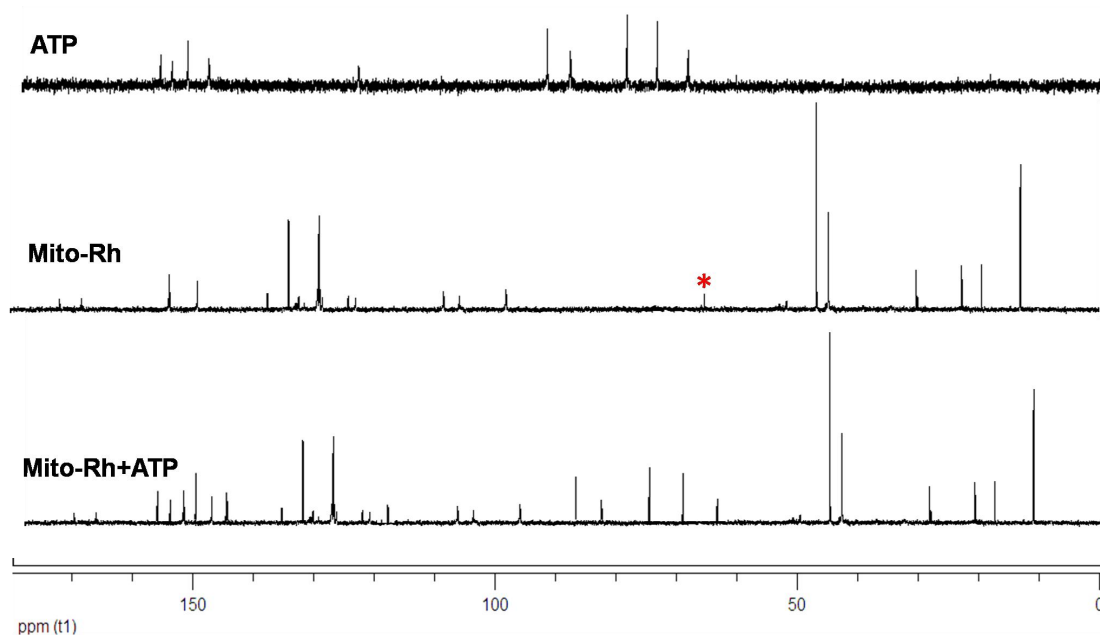

**Figure S10.**  $^{13}\text{C}$  NMR spectra of ATP, Mito-Rh and Mito-Rh+ATP. NMR solvent:  $\text{D}_2\text{O}$ .



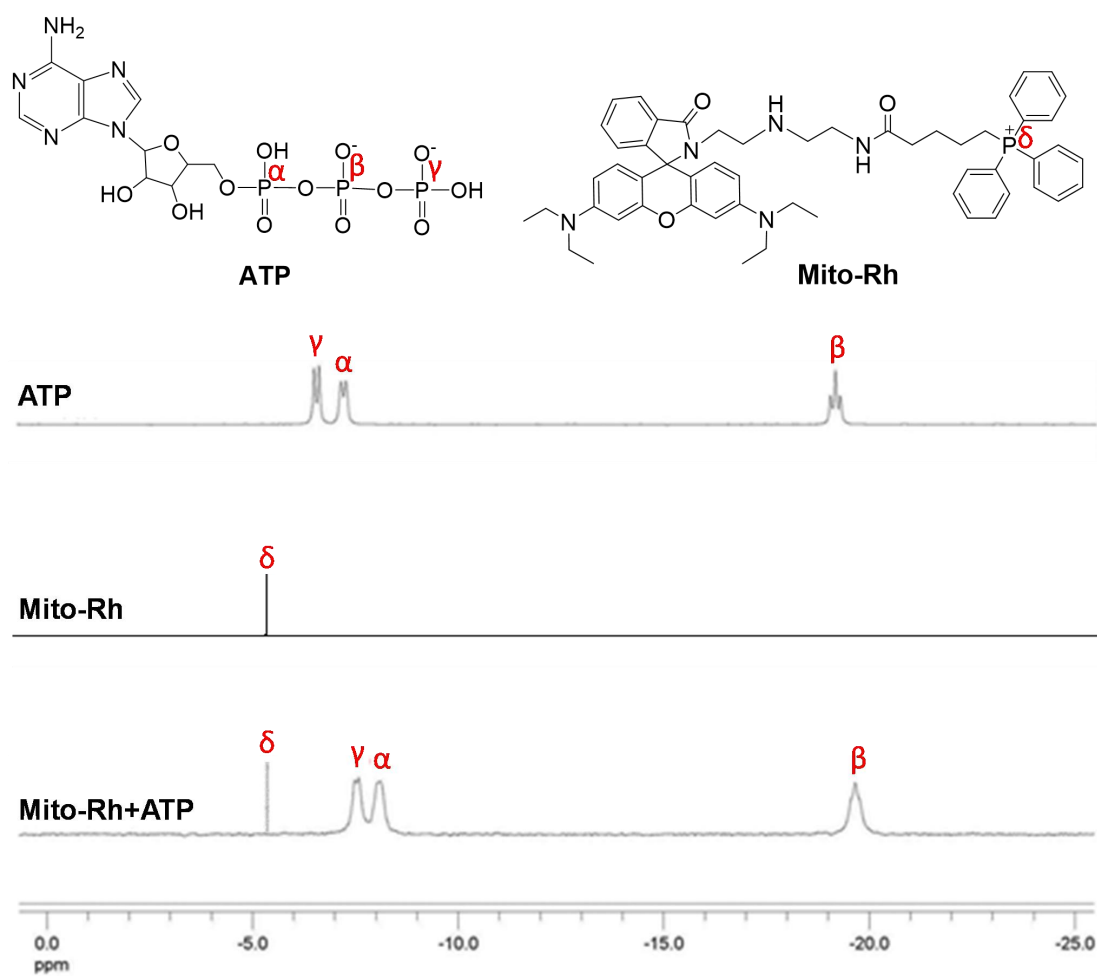

**Figure S11.**  $^{31}\text{P}$  NMR spectra of ATP, Mito-Rh and Mito-Rh+ATP. NMR solvent:  $\text{D}_2\text{O}$ .

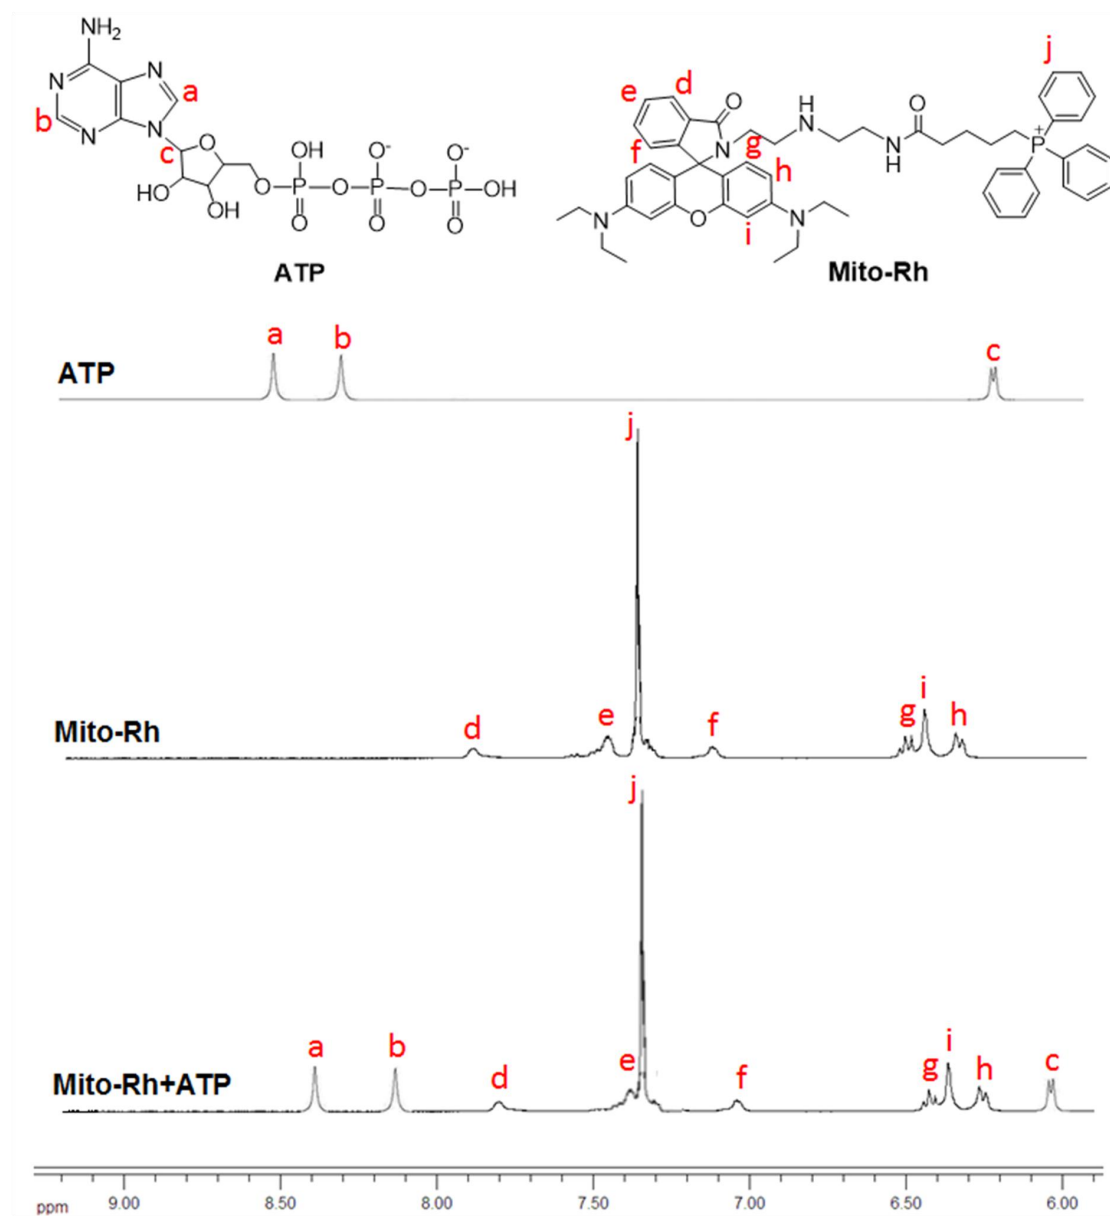

**Figure S12.** Partial  $^1\text{H}$  NMR spectra of ATP, Mito-Rh and Mito-Rh+ATP. NMR solvent:  $\text{D}_2\text{O}$ .

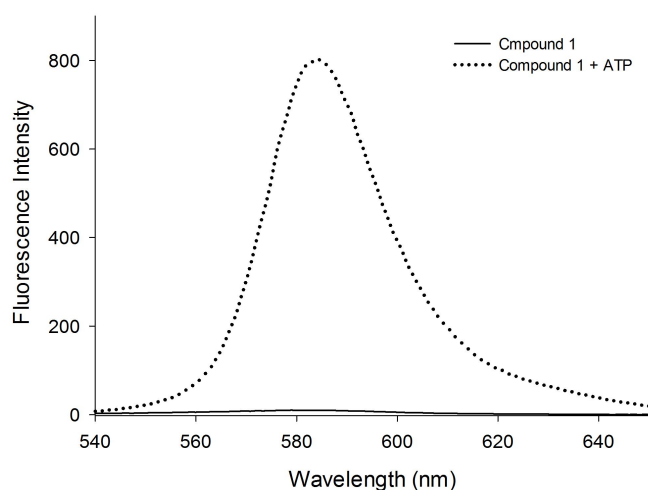

**Figure S13.** Fluorescence spectra of compound 1 (10  $\mu$ M) in the absence of ATP (solid line) and in the presence of ATP (10 mM, dotted line).

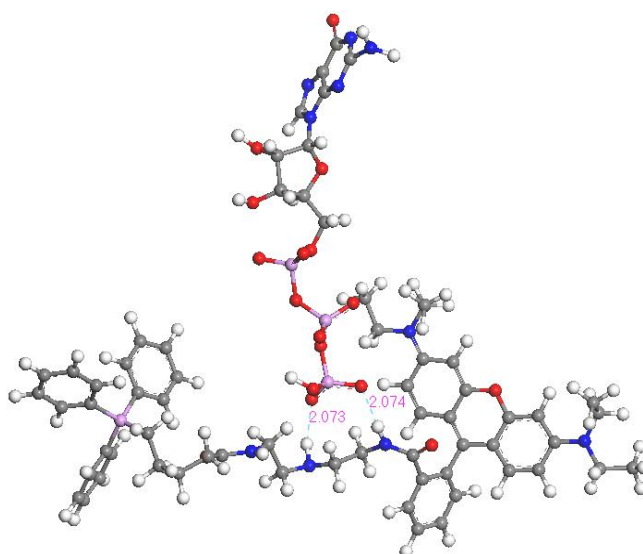

**Figure S14.** The optimized structures of Mito-Rh reacting with GTP. The hydrogen bond interaction is denoted by blue dotted lines. Carbon, hydrogen, oxygen, nitrogen and phosphorus atoms are colored with grey, white, red, blue and pink, respectively.

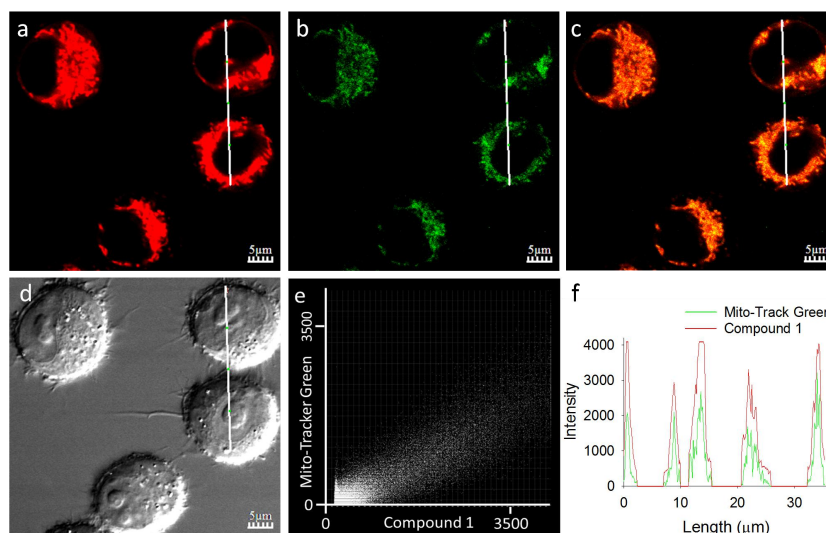

**Figure S15.** Colocalization imaging of HeLa cells staining with compound **1** and Mito-Tracker Green. (a) The cells were stained with compound **1** (1  $\mu$ M) on red channel. (b) The cells were stained with Mito-Tracker Green (1  $\mu$ M) on green channel. (c) Merged image; (d) Bright-field image. (e) Intensity scatter plot of compound **1** and Mito-Tracker Green. (f) Fluorescence intensity profile of regions of interest (white line in a and b). Scale bar, 5  $\mu$ m.

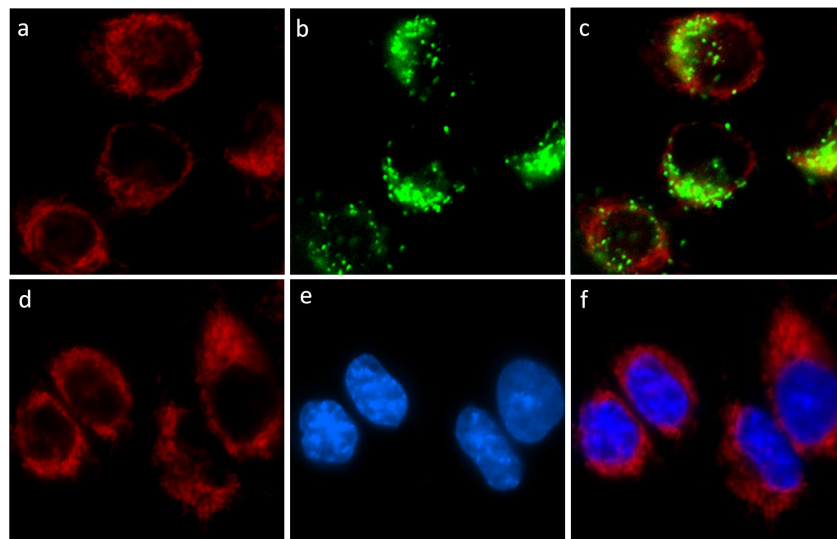

**Figure S16.** Fluorescence images of HeLa cells treated with Mito-Rh and Lyso-Tracker Green or DAPI. (a) The cells were stained with Mito-Rh (1  $\mu$ M) on red channel. (b) The cells were stained with Lyso-Tracker Green (1  $\mu$ M) on green channel. (c) Merged image of (a) and (b). (d) The cells were stained with Mito-Rh (1  $\mu$ M) on red channel. (e) The cells were stained with DAPI (1  $\mu$ M) on blue channel. (f) Merged image of (d) and (e).

Quantification of mitochondrial membrane potential alterations ( $\Delta\Psi_m$ ) in HeLa cells before and after treatment with CCCP was studied using JC-1 dye. JC-1 forms aggregates with red fluorescence in healthy cells with intact mitochondria, but it shows monomeric green fluorescence in early apoptotic cells. And thus  $\Delta\Psi_m$  can be displayed by the ratio of red fluorescence and green fluorescence. HeLa cells stained with JC-1 were treated before and after the addition CCCP (10  $\mu$ M) and fluorescence red / green ratio changed from 4.2 to 0.6 (Figure S17). The results indicate that CCCP can decrease mitochondrial membrane potential.

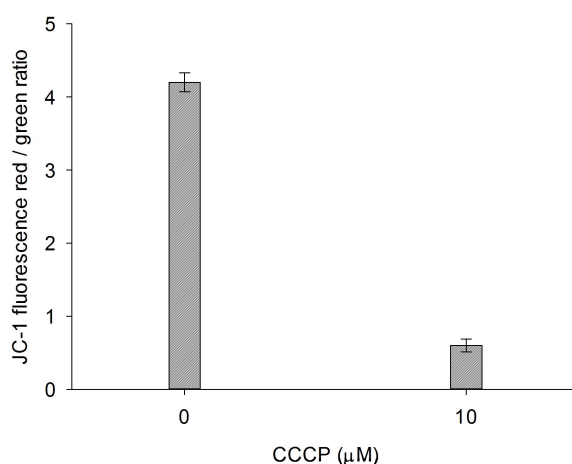

**Figure S17.** Quantification of mitochondrial membrane potential alterations ( $\Delta\Psi_m$ ) in HeLa cells before and after treatment with CCCP (10  $\mu$ M) was studied using JC-1 dye. Error bars represent the standard deviations of 6 trials.
